# Supplementary material
Source: PubMed Central journal article supplement (PMC5009448)
Supplement: supp_ntv228_Supplementary_Tables_1_3.pdf [file supp_ntv228_Supplementary_Tables_1_3.pdf]

**Online Table 1:** Key characteristics and findings of reviewed studies reporting on quit attempts

| Publication                                          | Data Source                                                             | Race definitions                                 | Sample size                   | Indicator                                                                                                                                                                                                                                                                                                                                                                    | Findings                                                                                                | Comments                                                                                                                                                                                        |
|------------------------------------------------------|-------------------------------------------------------------------------|--------------------------------------------------|-------------------------------|------------------------------------------------------------------------------------------------------------------------------------------------------------------------------------------------------------------------------------------------------------------------------------------------------------------------------------------------------------------------------|---------------------------------------------------------------------------------------------------------|-------------------------------------------------------------------------------------------------------------------------------------------------------------------------------------------------|
| <b>Population-based retrospective cohort studies</b> |                                                                         |                                                  |                               |                                                                                                                                                                                                                                                                                                                                                                              |                                                                                                         |                                                                                                                                                                                                 |
| CDC <sup>a</sup> , 1993 <sup>1</sup>                 | 1991 NHIS <sup>b</sup> ; ages $\geq$ 18 years; 1 year follow-up         | White-NH <sup>c</sup><br>Black-NH <sup>d</sup>   | Total n=43,732                | Quit attempt is defined as have quit smoking for at least one day during the previous year or being a former or some-day smoker at the time of the survey among persons who reported that they were smoking daily one year previously                                                                                                                                        | <b>White:</b><br><b>AOR<sup>e</sup> = 1.0 (referent)</b><br><b>Black:</b><br><b>AOR = 1.6 (1.3-1.8)</b> | CDC's 1991 National Health Interview Survey-Health Promotion and Disease Prevention supplement; model adjusted for age, sex, education, & poverty status                                        |
| USDHHS <sup>f</sup> , 2000 <sup>2</sup>              | 1995/1996 TUS-CPS <sup>g</sup> ; ages $\geq$ 25 years; 1 year follow-up | White-NH<br>Black-NH                             | White: 27,991<br>Black: 2,681 | Quit attempt is defined as stopping smoking for one day or longer in an attempt to quit smoking among persons who reported that they were smoking daily one year previously.                                                                                                                                                                                                 | <b>White: 22.6% +/- 0.6</b><br><b>Black: 26.7% +/- 1.7</b>                                              | 1995/1996 TUS-CPS; Table 2-3; p. 34; model adjusted for age, sex, education, & household income                                                                                                 |
| Levy et al., 2011 <sup>3</sup>                       | 2003 & 2006-2007 TUS-CPS; ages > 18 years; 4 years follow-up            | White-NH<br>Black-NH                             | Not reported                  | Among persons who reported that they were current smokers one year prior to being interviewed, a person was classified as having made a quit attempt if (s)he was currently not smoking or if (s)he was currently smoking but reported either trying to quit completely during the previous 12 months or having ever stopped for one day or longer in order to quit smoking. | <b>White: AOR=1.0 (referent)</b><br><b>Black: AOR=1.35 (1.35-1.35)<sup>h</sup></b>                      | Table 2; 2003 & 2006-2007 TUS-CPS; model adjusted for age, sex, income, marital status, education, daily tobacco use, tobacco dependence, psychiatric comorbidity, & physical health conditions |
| <b>Community/population-based cohort study</b>       |                                                                         |                                                  |                               |                                                                                                                                                                                                                                                                                                                                                                              |                                                                                                         |                                                                                                                                                                                                 |
| Rafful et al., 2013 <sup>4</sup>                     | NESARC <sup>i</sup> ; ages > 18 years; 3 years follow-up                | White-NOS <sup>j</sup><br>Black-NOS <sup>k</sup> | White: 1070<br>Black: 375     | The Alcohol Use Disorder and Associated Disabilities Interview Schedule-DSM-IV Version was used to generate DSM-IV diagnosis; it is unclear if this tool was also used to define quit attempt, as no other definition is offered                                                                                                                                             | White: 39.72% (referent)<br>Black: 45.33% (AOR=1.10; 0.80-1.51)                                         | NESARC Waves 1 (2001-2002) & 2 (2004-2005); model adjusted for sex, income, marital status, education, tobacco use, dependence symptoms, physical health conditions, & psychiatric disorders    |
| <b>Population-based cross-sectional studies</b>      |                                                                         |                                                  |                               |                                                                                                                                                                                                                                                                                                                                                                              |                                                                                                         |                                                                                                                                                                                                 |
| Hatziandreu et al., 1990 <sup>5</sup>                | 1986 AUTS <sup>l</sup> ; ages $\geq$ 17 years                           | White-NOS<br>Black-NOS                           | Total N = 13,031              | Major quit attempt is defined as abstinence from cigarettes for at least 7 consecutive days during previous year among current smokers.                                                                                                                                                                                                                                      | White: AOR=1.0 (referent)<br>Black: AOR=1.05                                                            | Model adjusted for sex, education, marital status, & age.                                                                                                                                       |

|                                      |                                                        |                        |                                                        |                                                                                                                                                                                                                                                                      |                                                                                                                                                                  |                                                                                                                                                                                                                                                                                                                                                                                 |
|--------------------------------------|--------------------------------------------------------|------------------------|--------------------------------------------------------|----------------------------------------------------------------------------------------------------------------------------------------------------------------------------------------------------------------------------------------------------------------------|------------------------------------------------------------------------------------------------------------------------------------------------------------------|---------------------------------------------------------------------------------------------------------------------------------------------------------------------------------------------------------------------------------------------------------------------------------------------------------------------------------------------------------------------------------|
|                                      |                                                        |                        |                                                        |                                                                                                                                                                                                                                                                      | (0.95-1.17)                                                                                                                                                      |                                                                                                                                                                                                                                                                                                                                                                                 |
| Trosclair et al., 2002 <sup>6</sup>  | 2000 NHIS; ages $\geq 18$ years                        | White-NH<br>Black-NH   | Total N = 32,374                                       | Quit attempt is defined as stopping smoking for $\geq 1$ day during the previous 12 months in an effort to quit, among current smokers (who smoke every day or some days)                                                                                            | White: 40.6%<br>+/- 2.9<br>Black: 45.0%<br>+/- 3.9                                                                                                               |                                                                                                                                                                                                                                                                                                                                                                                 |
| Fagan et al., 2007 <sup>7</sup>      | 2003 TUS-CPS; ages 18-30 years                         | White-NH<br>Black-NH   | Current smokers:<br>n-H White: 6,112<br>n-H Black: 582 | Quit attempt is defined as abstinence from smoking for $\geq 1$ day during the previous 12 months among young adult current smokers (who smoke every day or some days)                                                                                               | White-black differences in multivariable models were not significant for current smokers overall and for those current smokers who intended to quit <sup>m</sup> | Model adjusted for age, sex, employment status, school enrollment, family income, & smoking status                                                                                                                                                                                                                                                                              |
| Cokkinides et al., 2008 <sup>8</sup> | 2005 NHIS; ages $\geq 18$ years                        | White-NH<br>Black-NH   | White: 3,482<br>Black: 693                             | Quit attempt is defined as stopping smoking for $\geq 1$ day during the previous 12 months in an effort to quit, among current smokers who had seen a health care professional during the previous year.                                                             | <b>White: 44.2% (42.0-46.4)</b><br><b>Black: 51.8% (47.3-56.3)</b>                                                                                               | Analyses restricted to those who had seen a healthcare professional during the previous year                                                                                                                                                                                                                                                                                    |
| Messer et al., 2008 <sup>9</sup>     | 2003 TUS-CPS; ages 18-64 years                         | White-NOS<br>Black-NOS | Total N = 36,625                                       | Quit attempt is defined as having seriously tried to quit in the past year, among recent dependent smokers (defined as those who had smoked $\geq 100$ lifetime cigarettes, had ever smoked daily for $\geq 6$ months, and had smoked within the previous 12 months. | <b>White: AOR=1.0 (referent)</b><br><b>Black: AOR = 1.67 (1.44-1.95)<sup>n</sup></b>                                                                             | Model adjusted for age, sex, education, age of smoking initiation, time to first cigarette, & smoke-free workplace/home                                                                                                                                                                                                                                                         |
| Davilla et al., 2009 <sup>10</sup>   | 2007 Florida BRFSS <sup>o</sup> ; ages $\geq 18$ years | White-NH<br>Black-NH   | White: 2,980<br>Black: 217                             | Quit attempt is defined as having attempted to completely stop smoking during the previous year, among current smokers.                                                                                                                                              | <b>White: AOR=1.0 (referent)</b><br><b>Black: AOR=1.625 (1.148-2.299)<sup>p</sup></b>                                                                            | Table 3; BRFSS and Florida Tobacco Callback Survey, 2007; model adjusted for age, sex, education, marital status, children in household, past year weight change, intentional weight change, tobacco-related medical condition, alcohol use, nicotine dependence, perceived benefit of quitting, CPD, number cigarettes past 30 days, number cigarettes per day in past 30 days |

|                                      |                                                                     |                        |                                                                                                   |                                                                                                                                                                                                                                                                |                                                                                                                                                                                                                            |                                                                                                                                                                                                              |
|--------------------------------------|---------------------------------------------------------------------|------------------------|---------------------------------------------------------------------------------------------------|----------------------------------------------------------------------------------------------------------------------------------------------------------------------------------------------------------------------------------------------------------------|----------------------------------------------------------------------------------------------------------------------------------------------------------------------------------------------------------------------------|--------------------------------------------------------------------------------------------------------------------------------------------------------------------------------------------------------------|
| Stahre et al., 2010 <sup>11</sup>    | 2005 NHIS; ages $\geq 18$ years                                     | White-NOS<br>Black-NOS | Total N = 31,428                                                                                  | Quit attempt is defined as having tried to quit smoking during the previous year, among current smokers                                                                                                                                                        | <b>White: 41%</b><br><b>Black: 49%</b><br><b>(p=0.008)</b>                                                                                                                                                                 |                                                                                                                                                                                                              |
| Trinidad et al., 2011 <sup>12</sup>  | 2003 TUS-CPS; ages 20-64 years                                      | White-NH<br>Black-NH   | White: 142,208<br>Black: 16,060                                                                   | Quit attempt is defined as stopping smoking for $\geq 1$ day in an attempt to quit among current smokers                                                                                                                                                       | <b>Current daily smokers:</b><br><b>White: 69.4%</b><br><b>(68.4, 70.4)</b><br><b>Black: 58.6%</b><br><b>(56.3, 60.9)</b><br><br>Current nondaily smokers:<br>White: 43.3%<br>(41.3, 45.3)<br>Black: 41.7%<br>(37.2, 46.2) | Compared to white current smokers, African American smokers smoked fewer cigarettes/day, were equally likely to smoke within 30 minutes of awakening, and were less likely to have a total home smoking ban. |
| Kahende et al., 2011 <sup>13</sup>   | 2003 TUS-CPS; ages $\geq 18$ years                                  | White-NH<br>Black-NH   | White: 12,794<br>Black: 1,310                                                                     | Quit attempt includes current smokers (who smoke every day or some days) who reported abstinence from smoking for at least one day or longer because they were trying to quit during past year, and includes former smokers who reported quitting in past year | White: 43.0%<br>(42.2-43.8)<br>Black: 44.9%<br>(42.6-47.2)                                                                                                                                                                 |                                                                                                                                                                                                              |
| Malarcher et al., 2011 <sup>14</sup> | 2010 NHIS; ages $>18$ years                                         | White-NH<br>Black-NH   | Total N = 27,157                                                                                  | Quit attempt includes current smokers (who smoke every day or some days) who reported abstinence from smoking for at least one day or longer because they were trying to quit during past year, and includes former smokers who reported quitting in past year | <b>White: 50.7%</b><br><b>(48.6-52.7)</b><br><b>Black: 59.1%</b><br><b>(54.8-63.3)</b>                                                                                                                                     |                                                                                                                                                                                                              |
| Yong et al., 2014 <sup>15</sup>      | 2010 NHIS; ages $>18$ years who were working during prior 12 months | White-NH<br>Black-NH   | 3,698 current smokers and recent former smokers included in analyses for all racial/ethnic groups | Quit attempt includes current smokers (who smoked $\geq 2$ years) who reported abstinence from smoking for at least one day or longer because they were trying to quit during past year, and includes former smokers who reported quitting in past year        | White: 52.4%<br>(50.0-54.9)<br>Black: 60.0%<br>(54.7-65.4)                                                                                                                                                                 |                                                                                                                                                                                                              |

v. 09/11/2015

Bolded indicates significance of  $p < 0.05$  or non-overlapping 95% confidence intervals. <sup>a</sup>CDC = Centers for Disease Control and Prevention; <sup>b</sup>NHIS National Health Interview Study; <sup>c</sup>White race non-Hispanic; publication clearly indicates White does not include those of Hispanic origin; <sup>d</sup>Black race non-Hispanic; publication clearly indicates Black does not include those of Hispanic origin; <sup>e</sup>AOR = Adjusted Odds Ratio; <sup>f</sup>USDHHS = United States Department of Health and Human Services; <sup>g</sup>TUS-CPS = Tobacco Use Supplement to the Current Population Survey; <sup>h</sup>Further models (adding cigarettes per day and adding smoking < 30 minutes of waking to the original model) continued to maintain significance; <sup>i</sup>NESARC = national Epidemiologic Survey on Alcohol and Related Conditions; <sup>j</sup>White race, but publication does not state or is unclear if Hispanics are included in this racial group; <sup>k</sup>Black race, but publication does not state or is unclear if Hispanics are included in this racial group; <sup>l</sup>AUTS = Adult Use of Tobacco Survey; <sup>m</sup>Non-significant findings in analyses among all subgroups (current smokers, daily smokers, nondaily smokers) overall and among only those who were intending to quit); <sup>n</sup>Further models for quit attempt includes those who quit for at least 1 day during past year, among recent dependent smokers, were not significant; <sup>o</sup>BRFSS = Behavioral Risk Factor Surveillance System; <sup>p</sup>Results for quit attempts among current smokers who reported an attempt to stop smoking completely *during lifetime* was not significant (white: AOR=1.0 (referent) black: AOR=0.793 (0.513- 1.226)).

Note: Exact definition of race is provided once, in the “race definitions” column; subsequent columns use only “white” or “black.”

**Online Table 2:** Key characteristics and findings of reviewed studies reporting on abstinence

| Study                                         | Data Source                                                             | Race definitions                                 | Sample size                         | Indicator                                                                                                                                                                                                                                                                         | Findings                                                                                                   | Comments                                                                                                                                                 |
|-----------------------------------------------|-------------------------------------------------------------------------|--------------------------------------------------|-------------------------------------|-----------------------------------------------------------------------------------------------------------------------------------------------------------------------------------------------------------------------------------------------------------------------------------|------------------------------------------------------------------------------------------------------------|----------------------------------------------------------------------------------------------------------------------------------------------------------|
| <b>Population-based retrospective studies</b> |                                                                         |                                                  |                                     |                                                                                                                                                                                                                                                                                   |                                                                                                            |                                                                                                                                                          |
| CDC <sup>a</sup> , 1993 <sup>1</sup>          | 1991 NHIS <sup>b</sup> ; ages $\geq$ 18 years; 1 year follow-up         | White-NH <sup>c</sup><br>Black-NH <sup>d</sup>   | Total n=43,732                      | Abstinence among attempters is defined as having quit smoking cigarettes for at least 1 month at the time of the survey in 1991 by those who were smoking daily one year previously who had attempted to quit smoking (see definition in Table 1 above) during the previous year. | <b>White:</b><br><b>AOR<sup>e</sup> = 1.0 (referent)</b><br><b>Black:</b><br><b>AOR = 0.6 (0.4-0.9)</b>    | CDC's 1991 National Health Interview Survey-Health Promotion and Disease Prevention supplement; model adjusted for age, sex, education, & poverty status |
| CDC, 1993 <sup>1</sup>                        | 1991 NHIS; ages $\geq$ 18 years; 1 year follow-up                       | White-NH<br>Black-NH                             | Total n=43,732                      | Overall abstinence is defined as having quit smoking cigarettes for at least 1 month at the time of the survey in 1991 by those who were smoking daily one year previously.                                                                                                       | White:<br>AOR = 1.0 (referent)<br>Black:<br>AOR = 0.8 (0.5-1.2)                                            | CDC's 1991 National Health Interview Survey-Health Promotion and Disease Prevention supplement; model adjusted for age, sex, education, & poverty status |
| USDHHS <sup>f</sup> , 1998 <sup>16</sup>      | 1992/1993 TUS-CPS <sup>g</sup> ; ages $\geq$ 18 years; 1 year follow-up | White-NOS <sup>h</sup><br>Black-NOS <sup>i</sup> | Total n = 44,272                    | Abstinence for 1 – 90 days among those reporting daily smoking 1 year before being surveyed                                                                                                                                                                                       | <b>White: 3.4 (+/- 0.2)</b><br><b>Black: 2.2 (+/- 0.5)</b>                                                 | 1992-1993 TUS-CPS; Table 4, pg 27                                                                                                                        |
| USDHHS, 1998 <sup>16</sup>                    | 1992/1993 TUS-CPS; ages $\geq$ 18 years; 1 year follow-up               | White-NOS<br>Black-NOS                           | Total n = 44,272                    | Abstinence for 91-364 days among those reporting daily smoking 1 year before being surveyed                                                                                                                                                                                       | <b>White: 3.8 (+/- 0.2)</b><br><b>Black: 2.7 (+/- 0.5)</b>                                                 | 1992-1993 TUS-CPS; Table 4, pg 27                                                                                                                        |
| USDHHS, 2000 <sup>2</sup>                     | 1995-1996 TUS-CPS; ages $\geq$ 25 years; 1 year follow-up               | White-NH<br>Black-NH                             | White:<br>27,991<br>Black:<br>2,681 | Abstinence for 3+ months among those who reported they smoked on a daily basis one year ago                                                                                                                                                                                       | <b>White: 3.8% +/- 0.3</b><br><b>Black: 2.4% +/- 0.6</b>                                                   | Table2-3; p. 34                                                                                                                                          |
| Levy et al., 2011 <sup>3</sup>                | TUS-CPS; ages $\geq$ 18 years; 1 year follow-up                         | White-NH<br>Black-NH                             | Not reported                        | Recent quitters are those who quit in the past year and have been quit for at least 3 months;                                                                                                                                                                                     | <b>White:</b><br><b>AOR = 1.0 (referent)</b><br><b>Black:</b><br><b>AOR = 0.83 (0.82-0.83)<sup>j</sup></b> | TUS-CPS waves 2003 & 2007; model adjusted for age, sex, income, marital status, education, daily tobacco use,                                            |

|                                     |                                                                                        |                        |                           |                                                                                                                                                                                         |                                                                                                        |                                                                                                                                                                                                                                                                                                             |
|-------------------------------------|----------------------------------------------------------------------------------------|------------------------|---------------------------|-----------------------------------------------------------------------------------------------------------------------------------------------------------------------------------------|--------------------------------------------------------------------------------------------------------|-------------------------------------------------------------------------------------------------------------------------------------------------------------------------------------------------------------------------------------------------------------------------------------------------------------|
|                                     |                                                                                        |                        |                           |                                                                                                                                                                                         |                                                                                                        | tobacco dependence, psychiatric comorbidity, & physical health conditions                                                                                                                                                                                                                                   |
| <b>Clinic-based cohort studies</b>  |                                                                                        |                        |                           |                                                                                                                                                                                         |                                                                                                        |                                                                                                                                                                                                                                                                                                             |
| Hymowitz et al., 1991 <sup>17</sup> | Multiple Risk Factor Intervention Trial (MRFIT); ages not specified; 6 years follow-up | White-NOS<br>Black-NOS | Not reported              | Quitter defined as any smoker who at 12 months follow-up reported smoking 0 cigarettes per day (biochemically verified with the use of serum thiocyanate (SCN) determinations annually) | Regression coefficient <sup>k</sup> = -0.357 (blacks were less likely to quit, though not significant) | Table 6; Participants were men at greater risk for coronary heart disease; only usual care group reported; model adjusted for age, education, marital status, wife & friend smoking status, expectations of quitting, past quitting, alcohol use, life events, cigarettes per day (CPD), & personality type |
| Windsor et al., 1993 <sup>18</sup>  | Birmingham Trial II; mean age 24.7 years; 7.5 months follow-up                         | White-NOS<br>Black-NOS | Not reported              | Abstinence was defined as a cotinine value of not more than 30ng/mL at the follow-up assessment (verified biochemically).                                                               | White: 5.2%<br>Black: 10.7% (p=0.07)                                                                   | Participants were pregnant women; only comparison group reported; unclear what variables were controlled for in the models                                                                                                                                                                                  |
| Kendrick et al., 1995 <sup>19</sup> | Smoking Cessation in Pregnancy Project; ages not specified; 8 months follow-up         | White-NOS<br>Black-NOS | White: 4217<br>Black: 912 | Self-reported quitters were enrollment smokers who reported no smoking at the 8-month appointment (verified biochemically)                                                              | White: 4.8%<br>Black: 7.3% (not significant)                                                           | Table 3; participants were pregnant women; only control group quit rates reported; model adjusted for age, race, education, parity, passive smoke exposure, BMI, WIC status, presence of partner, caffeine/alcohol consumption, cotinine at enrollment, and clinic                                          |

|                                   |                                                               |                        |                           |                                                                                                                                                                                                                         |                                                                                                                                                                                             |                                                                                                                                                                                                                                                                                                                                          |
|-----------------------------------|---------------------------------------------------------------|------------------------|---------------------------|-------------------------------------------------------------------------------------------------------------------------------------------------------------------------------------------------------------------------|---------------------------------------------------------------------------------------------------------------------------------------------------------------------------------------------|------------------------------------------------------------------------------------------------------------------------------------------------------------------------------------------------------------------------------------------------------------------------------------------------------------------------------------------|
| Murray et al., 2001 <sup>20</sup> | Lung Health Study; ages 35-60 years; 5 years follow-up        | White-NOS<br>Black-NOS | White: 2868<br>Black: 200 | Abstinence from cigarettes validated by salivary cotinine <20ng/ml in self-reported non-users of nicotine gum, chewing tobacco, or snuff, and by expired air CO <10ppm in nicotine gum, chewing tobacco, or snuff users | Data points and confidence intervals not provided (Figure 1 and text indicate blacks were more likely to quit smoking, but this was non-significant (for years 2-5, usual care group only)) | Participants had mild to moderate airflow obstruction; model adjusted for clinic, group assignment, gender, age, education, education, income, marital status, CPD, menthol, and salivary cotinine                                                                                                                                       |
| Lando et al., 2003 <sup>21</sup>  | Teachable Moment (TEAM) project; ages 18-75; 1 year follow-up | White-NOS<br>Black-NOS | White: 1220<br>Black: 183 | 7-day point prevalence of smoking abstinence (% quit at 12 months), biochemically verified                                                                                                                              | <b>White: 18.0%</b><br><b>Black: 10.4%</b><br><b>(p=0.035)<sup>l</sup></b>                                                                                                                  | Table 3; Participants were hospital patients, data reported regardless of study condition; model adjusted for sex, age, marital status, education, hospital, time to first cigarette, stage of change, CPD, age of smoking initiation, perception of smoking relation to current illness, smoking-related diagnosis, recent quit attempt |
| Daza et al., 2006 <sup>22</sup>   | Working Well Trial; mean age = 39 years; 4 years follow-up    | White-NH<br>Black-NH   | White: 627<br>Black: 48   | Abstinence defined as self-reported 7-day point prevalence abstinence from cigarettes and smokeless tobacco at the 4-year follow-up assessment                                                                          | White:<br>OR = 1.0<br>(referent)<br>Black:<br>OR = 1.42<br>(p=0.33)                                                                                                                         | Table 2; Data collected at 40 worksites across southern U.S and reported regardless of study condition; smokeless tobacco users excluded at baseline; model adjusted for treatment effect, worksite clustering,                                                                                                                          |

|                                         |                                                                            |                        |                              |                                                                                                                                                                            |                                                                                                  |                                                                                                                                                                                                                                                                   |
|-----------------------------------------|----------------------------------------------------------------------------|------------------------|------------------------------|----------------------------------------------------------------------------------------------------------------------------------------------------------------------------|--------------------------------------------------------------------------------------------------|-------------------------------------------------------------------------------------------------------------------------------------------------------------------------------------------------------------------------------------------------------------------|
|                                         |                                                                            |                        |                              |                                                                                                                                                                            |                                                                                                  | age, sex, education, job status, marital status, tobacco-related variables, stage of change, alcohol use, health variables, and work-related variables                                                                                                            |
| Fu, Burgess, et al., 2008 <sup>23</sup> | 8 months follow-up                                                         | White-NOS<br>Black-NOS | White: 341<br>Black: 304     | Abstinence defined as self-reported 7-day point prevalence abstinence from cigarettes at the 8-month assessment                                                            | White:<br>OR <sup>m</sup> = 1.0<br>(referent)<br>Black:<br>OR = 0.98<br>(0.62-1.54) <sup>n</sup> | Table 3; Recruited via Minnesota Health Care Programs' NRT pharmacy claims; Participants were low-income individuals filing NRT claims; adjusted for confounding and response bias                                                                                |
| Smith et al., 2014 <sup>24</sup>        | Wisconsin Smokers Health Study; mean age=44.9 years; ~6.5 months follow-up | White-NOS<br>Black-NOS | White: 439<br>Black: 186     | Abstinence defined as 7-day point prevalence abstinence from cigarettes at the 26-week assessment, among baseline cigarette smokers (biochemically verified by exhaled CO) | <b>White:<br/>AOR=1.0<br/>(referent)<br/>Black: AOR=0.64<br/>(0.46-0.90)</b>                     | Table 6 (model 4); analysis includes menthol smokers, only; model adjusted for effects of time, treatment, gender, education, nicotine dependence, living with a smoker, friends smoking, and interaction effects                                                 |
| Burgess et al., 2014 <sup>25</sup>      | The Victory Study; ages 18-80, mean=59.5 years; 1 year follow-up           | White-NOS<br>Black-NOS | White:<br>1569<br>Black: 702 | Abstinence defined as a 6-month period of smoking abstinence reported at the 1-year follow-up survey, among baseline current smokers                                       | <b>White:<br/>AOR=1.0<br/>(referent)<br/>Black:<br/>AOR=1.59<br/>(1.13-2.24)</b>                 | Table 2; population of smokers enrolled in the Veterans Health Administration; reports main effects, irrespective of treatment condition; model adjusted for study design, race, social network characteristics, SES, smoking history, and intervention condition |
| Stevens et al.,                         | Comparative                                                                | White-NOS              | Total N:                     | Abstinence defined as cessation for 365 days                                                                                                                               | <b>White:</b>                                                                                    | Table 4; Data acquired                                                                                                                                                                                                                                            |



|                                                  |                                                                                 |                                   |                             |                                                                                                                                              |                                                                                    |                                                                                                                                                                                                                                                                                                                                            |
|--------------------------------------------------|---------------------------------------------------------------------------------|-----------------------------------|-----------------------------|----------------------------------------------------------------------------------------------------------------------------------------------|------------------------------------------------------------------------------------|--------------------------------------------------------------------------------------------------------------------------------------------------------------------------------------------------------------------------------------------------------------------------------------------------------------------------------------------|
| 2015 <sup>26</sup>                               | Effectiveness Research CER-Hub project; ages $\geq 18$ years; 4 years follow-up | Black-NOS                         | 34,391                      | or more by the end of the study period, among those seen at 1+ primary care visits & identified as a smoker at baseline                      | <b>AOR=1.0 (referent)</b><br><b>Black:</b><br><b>AOR=0.84 (0.75-0.94)</b>          | through electronic medical records (EMR); model adjusted for sex, age, ethnicity, and physical health comorbidities                                                                                                                                                                                                                        |
| <b>Community/population-based cohort studies</b> |                                                                                 |                                   |                             |                                                                                                                                              |                                                                                    |                                                                                                                                                                                                                                                                                                                                            |
| McWhorter et al., 1990 <sup>27</sup>             | NHANES <sup>o</sup> , ages 25-74 years; 9.2 years follow-up                     | White-H <sup>p</sup><br>Black-NOS | White: 1434<br>Black: 214   | “Successful” quitters were those current smokers at NHANES 1 who were and nonsmokers (not further defined) for at least 1 year at follow-up. | <b>White:</b><br><b>AOR = 2.24 (1.51-3.34)</b><br><b>Black: AOR=1.0 (referent)</b> | Table 3; NHANES I (1972-1975) and NHANES I Epidemiologic Followup Survey (1982-1984); model adjusted for age, sex, CPD, household income, education, hospitalization in follow-up period, age of smoking initiation, children in home, relative with cancer, urban v. rural residence, region of country, alcohol intake, & marital status |
| Hymowitz et al., 1997 <sup>28</sup>              | COMMIT <sup>q</sup> , ages 25-64 years; 5 years follow-up                       | White-NOS<br>Black-NOS            | White: 20,072<br>Black: 882 | “Quitter” defined as a person who reported not smoking cigarettes during the 6 months prior to the 5-year follow-up assessment               | White: 23.3% (referent)<br>Black: 27.7% (RR <sup>r</sup> = 0.98; 0.82-1.17)        | Table 2; model adjusted for age, sex, household income, education, alcohol consumption, CPD, age of smoking initiation, time to first cigarette, use non-cigarette product, type of cigarette, quit attempts, desire to quit, other household smokers, & COMMIT intervention status; Note: 2 of 22 communities were Canadian               |

|                                           |                                                                                                  |                        |                            |                                                                                                                                                                                                                                                       |                                                                                                                                                    |                                                                                                                                                                                                                                                                                     |
|-------------------------------------------|--------------------------------------------------------------------------------------------------|------------------------|----------------------------|-------------------------------------------------------------------------------------------------------------------------------------------------------------------------------------------------------------------------------------------------------|----------------------------------------------------------------------------------------------------------------------------------------------------|-------------------------------------------------------------------------------------------------------------------------------------------------------------------------------------------------------------------------------------------------------------------------------------|
| Kiefe et al., 2001 <sup>29</sup>          | CARDIA <sup>5</sup> ; Ages 18-30 years at baseline, 28-40 at 10-yr follow-up; 10 years follow-up | White-NOS<br>Black-NOS | White: 2022<br>Black: 1926 | Abstinence defined as the proportion of baseline smokers who were nonsmokers at years 2, 5, 7, and 10, among baseline regular smokers (reported at least 5 cigarettes/week most weeks for at least 3 months). <sup>†</sup>                            | White women: AOR = 1.0 (referent)<br>Black women: AOR = 0.88 (0.59-1.32)<br><br>White men: AOR = 1.0 (referent)<br>Black men: AOR=0.85 (0.53-1.37) | Urban cohort of young adults ; model adjusted for socioeconomic factors (education, family income, employment status, marital status, difficulty paying for basic necessities, home ownership, & health insurance status)                                                           |
| Hyland et al., 2004 <sup>30</sup>         | COMMIT, ages 25-64 years; 13 years follow-up                                                     | White-NH<br>Black-NH   | White: 5738<br>Black: 391  | “Quitter” defined as a person who reported not smoking cigarettes and not smoking/using any other tobacco products during the 6 months prior to the 13-year follow-up assessment                                                                      | White: 41.8% (referent)<br>Black: 45.8% (RR = 1.04; 0.83-1.31)                                                                                     | Table 3; model adjusted for age, sex, household income, education, alcohol consumption, CPD, age of smoking initiation, time to first cigarette, use non-cigarette product, type of cigarette, quit attempts, desire to quit, other household smokers, & COMMIT intervention status |
| Messer, Mills, et al., 2008 <sup>31</sup> | TUS CPS; ages $\geq$ 18 years; 1 year follow-up                                                  | White-NH<br>Black-NOS  | White: 2422<br>Black: 242  | “Successful quitting” was defined as $\geq$ 90 days abstinence= from cigarettes at the 1-year follow-up                                                                                                                                               | White: 7.7%<br>Black: 4.5% (p = 0.15) <sup>u</sup>                                                                                                 | Table 2; model adjusted for age, sex, education, household income, other household smokers, & children in household                                                                                                                                                                 |
| Caraballo et al., 2014 <sup>32</sup>      | CARDIA; Ages 18-30 years at baseline, 43-55 at most recent follow-up; 25 years follow-up         | White-NOS<br>Black-NOS | Not reported               | Cessation without relapse<br><i>Numerator</i> = quit at any follow-up & did not smoke at any subsequent follow-up appointments<br><i>Denominator</i> = ever smokers or previous smokers at baseline, year 2, or year 5 who were successfully followed | <b>White: 54.0% (50.8-57.3)</b><br><b>Black: 33.2% (29.9-36.5)<sup>v</sup></b>                                                                     | Table 2                                                                                                                                                                                                                                                                             |
| Caraballo et al., 2014 <sup>32</sup>      | CARDIA; Ages 18-30 years at baseline, 43-                                                        | White-NOS<br>Black-NOS | Not reported               | Failure to quit after relapse is indicated among participants who stopped smoking at a previous follow-up and started smoking                                                                                                                         | White: AOR = 1.0 (referent)                                                                                                                        | Table 6; model adjusted for sex, age, and education                                                                                                                                                                                                                                 |

v. 09/11/2015

|  |                                                 |  |  |                                                                                                                                                                                                                                                                                                                                                                                                                               |                                     |  |
|--|-------------------------------------------------|--|--|-------------------------------------------------------------------------------------------------------------------------------------------------------------------------------------------------------------------------------------------------------------------------------------------------------------------------------------------------------------------------------------------------------------------------------|-------------------------------------|--|
|  | 55 at most recent follow-up; 25 years follow-up |  |  | again at any of the subsequent follow-ups, and was a current smoker at last follow-up<br><i>Numerator</i> = stopped smoking at a previous follow-up and started smoking again, and was a current smoker at last follow-up<br><i>Denominator</i> = ever smokers or previous smokers at baseline, year 2, or year 5, excluding those were always smoked and successful quitters without relapse, who were successfully followed | Black:<br>AOR = 1.05<br>(0.72-1.53) |  |
|--|-------------------------------------------------|--|--|-------------------------------------------------------------------------------------------------------------------------------------------------------------------------------------------------------------------------------------------------------------------------------------------------------------------------------------------------------------------------------------------------------------------------------|-------------------------------------|--|

Bolded text indicates significance at  $p < 0.05$  or non-overlapping 95% confidence intervals. <sup>a</sup>NHIS = National Health Interview Survey; <sup>b</sup>White race, but publication does not state or is unclear if Hispanics are included in this racial group; <sup>c</sup>Black race, but publication does not state or is unclear if Hispanics are included in this racial group; <sup>d</sup>AOR = Adjusted Odds Ratio; <sup>e</sup>AUTS = Adult Use of Tobacco Survey; <sup>f</sup>US DHHS = United States Department of Health and Human Services; <sup>g</sup>White race non-Hispanic; publication clearly indicates White does not include those of Hispanic origin; <sup>h</sup>Black race non-Hispanic; publication clearly indicates Black does not include those of Hispanic origin; <sup>i</sup>TUS-CPS = Tobacco Use Supplement to the Current Population Survey;

**Online Table 3:** Key characteristics and findings of reviewed studies reporting on measures of abstinence

| Study                                                | Data Source                                                                                               | Sample size                   | Findings                                                                                                                       |
|------------------------------------------------------|-----------------------------------------------------------------------------------------------------------|-------------------------------|--------------------------------------------------------------------------------------------------------------------------------|
| <b>Population-based retrospective cohort studies</b> |                                                                                                           |                               |                                                                                                                                |
| CDC <sup>a</sup> , 1993 <sup>4</sup>                 | 1991 NHIS <sup>b</sup> ;<br>ages $\geq$ 18 years; 1<br>year follow-up<br>(abstinence among<br>attempters) | Total<br>n=43,732             | <b>White:</b><br><b>AOR<sup>c</sup> = 1.0</b><br><b>(referent)</b><br><b>Black:</b><br><b>AOR = 0.6</b><br><b>(0.4-0.9)</b>    |
| CDC, 1993 <sup>4</sup>                               | 1991 NHIS;<br>ages $\geq$ 18 years; 1<br>year follow-up<br>(overall abstinence)                           | Total<br>n=43,732             | White:<br>AOR = 1.0<br>(referent)<br>Black:<br>AOR = 0.8<br>(0.5-1.2)                                                          |
| USDHHS <sup>d</sup> , 1998 <sup>2</sup>              | 1992/1993 TUS-<br>CPS <sup>e</sup> ;<br>ages $\geq$ 18 years; 1<br>year follow-up                         | Total n =<br>44,272           | <b>White: 3.4%</b><br><b>(+/- 0.2)</b><br><b>Black: 2.2%</b><br><b>(+/- 0.5)</b>                                               |
| USDHHS, 1998 <sup>2</sup>                            | 1992/1993 TUS-<br>CPS;<br>ages $\geq$ 18 years; 1<br>year follow-up                                       | Total n =<br>44,272           | <b>White: 3.8%</b><br><b>(+/- 0.2)</b><br><b>Black: 2.7%</b><br><b>(+/- 0.5)</b>                                               |
| USDHHS, 2000 <sup>12</sup>                           | 1995-1996 TUS-<br>CPS;<br>ages $\geq$ 25 years; 1<br>year follow-up                                       | White: 27,991<br>Black: 2,681 | <b>White: 3.8%</b><br><b>+/- 0.3</b><br><b>Black: 2.4%</b><br><b>+/- 0.6</b>                                                   |
| Levy et al.,<br>2011 <sup>11</sup>                   | TUS-CPS;<br>ages $\geq$ 18 years; 1<br>year follow-up                                                     | Not reported                  | <b>White:</b><br><b>AOR = 1.0</b><br><b>(referent)</b><br><b>Black:</b><br><b>AOR = 0.83</b><br><b>(0.82-0.83)<sup>f</sup></b> |
| <b>Clinic-based cohort studies</b>                   |                                                                                                           |                               |                                                                                                                                |
| Hymowitz et al.,<br>1991 <sup>33</sup>               | Multiple Risk Factor<br>Intervention Trial<br>(MRFIT);<br>ages not specified;<br>6 years follow-up        | Not reported                  | Regression<br>coefficient <sup>g</sup> =<br>-0.357<br>(blacks were less<br>likely to quit,<br>though not<br>significant)       |
| Windsor et al.,<br>1993 <sup>39</sup>                | Birmingham Trial II;<br>mean age 24.7<br>years; 7.5 months<br>follow-up                                   | Not reported                  | White: 5.2%<br>Black: 10.7%<br>(p=0.07)                                                                                        |
| Kendrick et al.,<br>1995 <sup>34</sup>               | Smoking Cessation<br>in Pregnancy<br>Project; ages not<br>specified; 8 months<br>follow-up                | White: 4217<br>Black: 912     | White: 4.8%<br>Black: 7.3%<br>(not significant)                                                                                |
| Murray et al.,<br>2001 <sup>36</sup>                 | Lung Health Study;<br>ages 35-60 years; 5<br>years follow-up                                              | White: 2868<br>Black: 200     | Data points and<br>confidence intervals<br>not provided (Figure<br>1 and text indicate<br>blacks were more                     |

|                                                  |                                                                                                  |                             |                                                                                                        |
|--------------------------------------------------|--------------------------------------------------------------------------------------------------|-----------------------------|--------------------------------------------------------------------------------------------------------|
|                                                  |                                                                                                  |                             | likely to quit smoking, but this was non-significant (for years 2-5, usual care group only))           |
| Lando et al., 2003 <sup>35</sup>                 | Teachable Moment (TEAM) project; ages 18-75; 1 year follow-up                                    | White: 1220<br>Black: 183   | <b>White: 18.0%</b><br><b>Black: 10.4%</b><br><b>(p=0.035)<sup>h</sup></b>                             |
| Daza et al., 2006 <sup>31</sup>                  | Working Well Trial; mean age = 39 years; 4 years follow-up                                       | White: 627<br>Black: 48     | White:<br>OR = 1.0<br>(referent)<br>Black:<br>OR = 1.42 (p=0.33)                                       |
| Fu, Burgess, et al., 2008 <sup>32</sup>          | 8 months follow-up                                                                               | White: 341<br>Black: 304    | White:<br>OR <sup>i</sup> = 1.0<br>(referent)<br>Black:<br>OR = 0.98<br>(0.62-1.54) <sup>j</sup>       |
| Smith et al., 2014 <sup>37</sup>                 | Wisconsin Smokers Health Study; mean age=44.9 years; ~6.5 months follow-up                       | White: 439<br>Black: 186    | <b>White: AOR=1.0 (referent)</b><br><b>Black: AOR= 0.64 (0.46-0.90)</b>                                |
| Burgess et al., 2014 <sup>30</sup>               | The Victory Study; ages 18-80, mean=59.5 years; 1 year follow-up                                 | White: 1569<br>Black: 702   | <b>White: AOR=1.0 (referent)</b><br><b>Black: AOR=1.59 (1.13-2.24)</b>                                 |
| Stevens et al., 2015 <sup>38</sup>               | Comparative Effectiveness Research CER-Hub project; ages ≥ 18 years; 4 years follow-up           | Total N:<br>34,391          | <b>White: AOR=1.0 (referent)</b><br><b>Black: AOR=0.84 (0.75-0.94)</b>                                 |
| <b>Community/population-based cohort studies</b> |                                                                                                  |                             |                                                                                                        |
| McWhorter et al., 1990 <sup>46</sup>             | NHANES <sup>k</sup> , ages 25-74 years; 9.2 years follow-up                                      | White: 1434<br>Black: 214   | <b>White: AOR = 2.24 (1.51-3.34)</b><br><b>Black: AOR=1.0 (referent)</b>                               |
| Hymowitz et al., 1997 <sup>44</sup>              | COMMIT <sup>l</sup> , ages 25-64 years; 5 years follow-up                                        | White: 20,072<br>Black: 882 | White: 23.3%<br>(referent)<br>Black: 27.7%<br>(RR <sup>m</sup> = 0.98; 0.82-1.17)                      |
| Kiefe et al., 2001 <sup>45</sup>                 | CARDIA <sup>n</sup> ; Ages 18-30 years at baseline, 28-40 at 10-yr follow-up; 10 years follow-up | White: 2022<br>Black: 1926  | White women:<br>AOR = 1.0<br>(referent)<br>Black women:<br>AOR = 0.88<br>(0.59-1.32)<br><br>White men: |

|                                              |                                                                                                                                                    |                           |                                                                                                    |
|----------------------------------------------|----------------------------------------------------------------------------------------------------------------------------------------------------|---------------------------|----------------------------------------------------------------------------------------------------|
|                                              |                                                                                                                                                    |                           | AOR = 1.0<br>(referent)<br>Black men:<br>AOR=0.85<br>(0.53-1.37)                                   |
| Hyland et al.,<br>2004 <sup>43</sup>         | COMMIT,<br>ages 25-64 years;<br>13 years follow-up                                                                                                 | White: 5738<br>Black: 391 | White: 41.8%<br>(referent)<br>Black: 45.8%<br>(RR = 1.04;<br>0.83-1.31)                            |
| Messer, Mills, et<br>al., 2008 <sup>47</sup> | TUS CPS;<br>ages $\geq$ 18 years; 1<br>year follow-up                                                                                              | White: 2422<br>Black: 242 | White: 7.7%<br>Black: 4.5%<br>( $p = 0.15$ ) <sup>o</sup>                                          |
| Caraballo et al.,<br>2014 <sup>42</sup>      | CARDIA;<br>Ages 18-30 years at<br>baseline, 43-55 at<br>most recent follow-<br>up; 25 years follow-<br>up (cessation<br>without relapse)           | Not reported              | <b>White: 54.0%</b><br><b>(50.8-57.3)</b><br><b>Black: 33.2%</b><br><b>(29.9-36.5)<sup>p</sup></b> |
| Caraballo et al.,<br>2014 <sup>42</sup>      | CARDIA;<br>Ages 18-30 years at<br>baseline, 43-55 at<br>most recent follow-<br>up; 25 years follow-<br>up (failure to quit<br>again after relapse) | Not reported              | White:<br>AOR = 1.0<br>(referent)<br>Black:<br>AOR = 1.05<br>(0.72-1.53)                           |

Bolded indicates significance of  $p < 0.05$  or non-overlapping 95% confidence intervals; <sup>a</sup>CDC = Centers for Disease Control and Prevention; <sup>b</sup>NHIS National Health Interview Study; <sup>c</sup>AOR = Adjusted Odds Ratio; <sup>d</sup>USDHHS = United States Department of Health and Human Services; <sup>e</sup>TUS-CPS = Tobacco Use Supplement to the Current Population Survey; <sup>f</sup>Further models (adding cigarettes per day and adding menthol status to the original model, and models assessing long-term quitting (long-term quitters are those who quit in the past 5 years and have been quit for at least 3 months)) continued to maintain significance; <sup>g</sup>For the regression equation, black=1, other=0; <sup>h</sup>Data points and p-values not reported for race in the final logistic regression model for 12-month follow-up, p-value included other races, smokers at baseline had smoked in the previous 3 months and been a daily smoker for at least 1 month in the previous year; <sup>i</sup>OR = Odds Ratio; <sup>j</sup>AORs also reported, but none were significant, 30-day duration abstinence rate from cigarettes also reported and not significant; <sup>k</sup>NHANES = National Health and Nutrition Examination Survey; <sup>l</sup>COMMIT = Community Intervention Trial for Smoking Cessation; <sup>m</sup>RR = Risk Ratio; <sup>n</sup>CARDIA = Coronary Artery Risk Development in Young Adults; <sup>o</sup>p-value is for all race/ethnic categories (African American, Hispanic/other, and non-Hispanic white); <sup>p</sup>Further models showed: no significant differences among whites and blacks in successful quitting with relapse (participants relapsed but quit by end of study; Table 2), no significant differences in unsuccessful quitting (participants relapsed but did not quit by the end of the study; Table 2), and significant differences for participants who relapsed (among baseline formers and persons who quit during the study; White AOR: 1.0, Black AOR: 1.43 (1.12-1.83) Table 5).

Note: Exact definition of race is provided once, in the “race definitions” column in online Table 2; columns here use only “white” or “black.”

Online Supplement References:

1. Centers for Disease Control and Prevention. Smoking cessation during previous year among adults--United States, 1990 and 1991. *MMWR Morb Mortal Wkly Rep.* 1993;42(26):504-507.
2. U.S. Department of Health and Human Services. *Population Based Smoking Cessation: Proceedings of a Conference on What Works to Influence Cessation in the General Population.* Bethesda, MD: U.S. Department of Health and Human Services, Public Health Service, National Institutes of Health, National Cancer Institute.;2000.
3. Levy DT, Blackman K, Tauras J, et al. Quit attempts and quit rates among menthol and nonmenthol smokers in the United States. *Am J Public Health.* 2011;101(7):1241-1247.
4. Rafful C, Garcia-Rodriguez O, Wang S, Secades-Villa R, Martinez-Ortega JM, Blanco C. Predictors of quit attempts and successful quit attempts in a nationally representative sample of smokers. *Addict Behav.* 2013;38(4):1920-1923.
5. Hatziandreu EJ, Pierce JP, Lefkopoulou M, et al. Quitting smoking in the United States in 1986. *J Natl Cancer Inst.* 1990;82(17):1402-1406.
6. Trosclair A, Husten C, Pederson L, Dhillon I. Cigarette smoking among adults--United States, 2000. *MMWR Morb Mortal Wkly Rep.* 2002;51(29):642-645.
7. Fagan P, Augustson E, Backinger CL, et al. Quit attempts and intention to quit cigarette smoking among young adults in the United States. *Am J Public Health.* 2007;97(8):1412-1420.
8. Cokkinides VE, Halpern MT, Barbeau EM, Ward E, Thun MJ. Racial and ethnic disparities in smoking-cessation interventions: analysis of the 2005 National Health Interview Survey. *Am J Prev Med.* 2008;34(5):404-412.
9. Messer K, Trinidad DR, Al-Delaimy WK, Pierce JP. Smoking cessation rates in the United States: a comparison of young adult and older smokers. *Am J Public Health.* 2008;98(2):317-322.
10. Davila EP, Zhao W, Byrne M, et al. Correlates of smoking quit attempts: Florida Tobacco Callback Survey, 2007. *Tob Induc Dis.* 2009;5:10.
11. Stahre M, Okuyemi KS, Joseph AM, Fu SS. Racial/ethnic differences in menthol cigarette smoking, population quit ratios and utilization of evidence-based tobacco cessation treatments. *Addiction.* 2010;105 Suppl 1:75-83.
12. Trinidad DR, Perez-Stable EJ, White MM, Emery SL, Messer K. A nationwide analysis of US racial/ethnic disparities in smoking behaviors, smoking cessation, and cessation-related factors. *Am J Public Health.* 2011;101(4):699-706.
13. Kahende JW, Malarcher AM, Teplinskaya A, Asman KJ. Quit attempt correlates among smokers by race/ethnicity. *Int J Environ Res Public Health.* 2011;8(10):3871-3888.
14. Malarcher A, Dube S, Shaw L, Babb S, Kaufmann R. Quitting smoking among adults--United States, 2001-2010. *MMWR Morb Mortal Wkly Rep.* 2011;60(44):1513-1519.



15. Yong LC, Luckhaupt SE, Li J, Calvert GM. Quit interest, quit attempt and recent cigarette smoking cessation in the US working population, 2010. *Occup Environ Med.* 2014;71(6):405-414.
16. U.S. Department of Health and Human Services. *Tobacco use among U.S. racial/ethnic minority groups--African Americans, American Indians and Alaska Natives, Asian Americans and Pacific Islanders, Hispanics. A Report of the Surgeon General.* . Atlanta, GA: U.S. Department of Health and Human Services, Centers for Disease Control and Prevention, National Center for Chronic Disease Prevention and Health Promotion, Office on Smoking and Health;1998.
17. Hymowitz N, Sexton M, Ockene J, Grandits G. Baseline factors associated with smoking cessation and relapse. MRFIT Research Group. *Prev Med.* 1991;20(5):590-601.
18. Windsor RA, Lowe JB, Perkins LL, et al. Health education for pregnant smokers: its behavioral impact and cost benefit. *Am J Public Health.* 1993;83(2):201-206.
19. Kendrick JS, Zahniser SC, Miller N, et al. Integrating smoking cessation into routine public prenatal care: the Smoking Cessation in Pregnancy project. *Am J Public Health.* 1995;85(2):217-222.
20. Murray RP, Connett JE, Buist AS, Gerald LB, Eichenhorn MS. Experience of Black participants in the Lung Health Study smoking cessation intervention program. *Nicotine Tob Res.* 2001;3(4):375-382.
21. Lando H, Hennrikus D, McCarty M, Vessey J. Predictors of quitting in hospitalized smokers. *Nicotine Tob Res.* 2003;5(2):215-222.
22. Daza P, Cofta-Woerpel L, Mazas C, et al. Racial and ethnic differences in predictors of smoking cessation. *Subst Use Misuse.* 2006;41(3):317-339.
23. Fu SS, Burgess DJ, Hatsukami DK, et al. Race and nicotine replacement treatment outcomes among low-income smokers. *Am J Prev Med.* 2008;35(6 Suppl):S442-448.
24. Smith SS, Fiore MC, Baker TB. Smoking cessation in smokers who smoke menthol and non-menthol cigarettes. *Addiction.* 2014;109(12):2107-2117.
25. Burgess DJ, van Ryn M, Noorbaloochi S, et al. Smoking cessation among African American and white smokers in the Veterans Affairs health care system. *Am J Public Health.* 2014;104 Suppl 4:S580-587.
26. Stevens VJ, Solberg LI, Bailey SR, et al. Assessing Trends in Tobacco Cessation in Diverse Patient Populations. *Nicotine Tob Res.* 2015.
27. McWhorter WP, Boyd GM, Mattson ME. Predictors of quitting smoking: the NHANES I followup experience. *J Clin Epidemiol.* 1990;43(12):1399-1405.
28. Hymowitz N, Cummings KM, Hyland A, Lynn WR, Pechacek TF, Hartwell TD. Predictors of smoking cessation in a cohort of adult smokers followed for five years. *Tob Control.* 1997;6 Suppl 2:S57-62.
29. Kiefe CI, Williams OD, Lewis CE, Allison JJ, Sekar P, Wagenknecht LE. Ten-year changes in smoking among young adults: are racial differences explained by socioeconomic factors in the CARDIA study? *Am J Public Health.* 2001;91(2):213-218.
30. Hyland A, Li Q, Bauer JE, Giovino GA, Steger C, Cummings KM. Predictors of cessation in a cohort of current and former smokers followed over 13 years. *Nicotine Tob Res.* 2004;6 Suppl 3:S363-369.

v. 09/11/2015

31. Messer K, Mills AL, White MM, Pierce JP. The effect of smoke-free homes on smoking behavior in the U.S. *Am J Prev Med.* 2008;35(3):210-216.
32. Caraballo RS, Kruger J, Asman K, et al. Relapse among cigarette smokers: the CARDIA longitudinal study - 1985-2011. *Addict Behav.* 2014;39(1):101-106.
